# Supplementary material for: Deficiency of ITGAM Attenuates Experimental Abdominal Aortic Aneurysm in Mice
Source: PubMed Central journal article supplement — J Am Heart Assoc. 2021 Mar 20;10(7):e019900. doi: 10.1161/JAHA.120.019900 (PMC8174368; doi:10.1161/jaha.120.019900), 2021-03-20

# SUPPLEMENTAL MATERIAL

**Table S1. Clinical characteristics of patients with abdominal aortic aneurysm and organ donors.**

|                                        | Patient | Patient | Patient | Patient | Control | Control | Control | Control |
|----------------------------------------|---------|---------|---------|---------|---------|---------|---------|---------|
|                                        | 1       | 2       | 3       | 4       | 1       | 2       | 3       | 4       |
| Sex                                    | Male    | Female  |
| Hypertension                           | -       | +       | -       | +       | U       | U       | U       | U       |
| Diabetes                               | -       | +       | -       | -       | U       | U       | U       | U       |
| Dyslipidemia                           | -       | -       | -       | -       | U       | U       | U       | U       |
| CAD                                    | -       | -       | -       | -       | U       | U       | U       | U       |
| COPD                                   | -       | -       | -       | -       | U       | U       | U       | U       |
| Renal dysfunction                      | -       | -       | -       | -       | U       | U       | U       | U       |
| Stroke                                 | -       | -       | -       | +       | U       | U       | U       | U       |
| Smoking                                | +       | -       | +       | +       | U       | U       | U       | U       |
| Maximum abdominal aortic diameter (mm) | 61.7    | 65.1    | 59.7    | 56.0    | U       | U       | U       | U       |
| Aortic neck diameter (mm)              | 33.9    | 20.2    | 21.6    | 20.0    | U       | U       | U       | U       |
| Proximal landing zone (mm)             | 27.9    | 5.0     | 45.1    | 20.0    | U       | U       | U       | U       |
| Aortic neck angulation (°)             | 90      | 30      | 10      | 15      | U       | U       | U       | U       |

CAD, coronary artery disease; COPD, chronic obstructive pulmonary disease; U, unclear.

**Table S2. Primers used for real-time quantitative reverse transcription-polymerase chain reaction.**

| Genes                               | Forward and reverse sequence                                        |
|-------------------------------------|---------------------------------------------------------------------|
| human <i>GAPDH</i>                  | F: 5'-GGGAAACTGTGGCGTGAT-3'<br>R: 5'-GGGAAACTGTGGCGTGAT-3'          |
| human <i>ITGAM</i>                  | F: 5'-GCTGCCGCCATCATCTTAC-3'<br>R: 5'-GTGCCCTTGACATTAGCGTT-3'       |
| mus <i><math>\beta</math>-actin</i> | F: 5'-GTACCACCATGTACCCAGGC-3'<br>R: 5'-AACGCAGCTCAGTAACAGTCC-3'     |
| mus <i>CCL3</i>                     | F: 5'-CTATTTTGAAACCAGCAGCCTT-3'<br>R: 5'-CAGGTGGCAGGAATGTTCC-3'     |
| mus <i>CCL4</i>                     | F: 5'-CTTCTGTGCTCCAGGGTTCTC-3'<br>R: 5'-GCTGGTCTCATAGTAATCCATCAC-3' |
| mus <i>CCR5</i>                     | F: 5'-GTGAGACATCCGTTCCCCCTAC-3'<br>R: 5'-GGAAGAGCAGGTCAGAGATGGC-3'  |
| mus <i>GNB4</i>                     | F: 5'-GCCGACTCTTTGACCTCC-3'<br>R: 5'-CATCAGTCACACCTAAGCAGC-3'       |
| mus <i>CYBB</i>                     | F: 5'-GGGATAACGAGTTCAAGACCAT-3'<br>R: 5'-TCTCCTACAACCAACCAGCAT-3'   |
| mus <i>TNF<math>\alpha</math></i>   | F: 5'-CCTCTTCTCATTCCCTGCTTGTG-3'<br>R: 5'-GGTCTGGGCCATAGAACTGAT-3'  |
| mus <i>IL6</i>                      | F: 5'-ACCACGGCCTTCCCTACTTC-3'<br>R: 5'-CTCATTTCCACGATTTCCCAG-3'     |
| mus <i>IL1B</i>                     | F: 5'-CTTCAGGCAGGCAGTATCACTC-3'<br>R: 5'-GCAGTTGTCTAATGGGAACGTC-3'  |
| mus <i>CCL2</i>                     | F: 5'-GTCATGCTTCTGGGCCTGC-3'<br>R: 5'-ACTCATTGGGATCATCTTGCTG-3'     |
| mus <i>MMP2</i>                     | F: 5'-GTTCTTCGCAGGGAATGAG-3'<br>R: 5'-ACTTGTCTCCTGCAAAGATGTA-3'     |
| mus <i>MMP9</i>                     | F: 5'-CCGAGCTATCCACTCATCAAAC-3'<br>R: 5'-CTGAACCATAACGCACAGACC-3'   |

**Figure S1. Animal study design.**

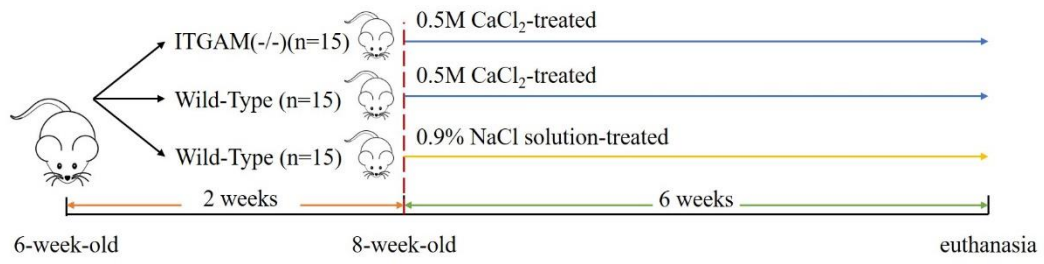

Supplement: JAH3-10-e019900-s001.pdf [file JAH3-10-e019900-s001.pdf]
